# Supplementary material for: Axon injury triggers EFA-6 mediated destabilization of axonal microtubules via TACC and doublecortin like kinase
Source: eLife journal article supplement (doi:10.7554/elife.08695), 2015-09-04
Supplement: supp [file elife-08695-supp-v1.zip]

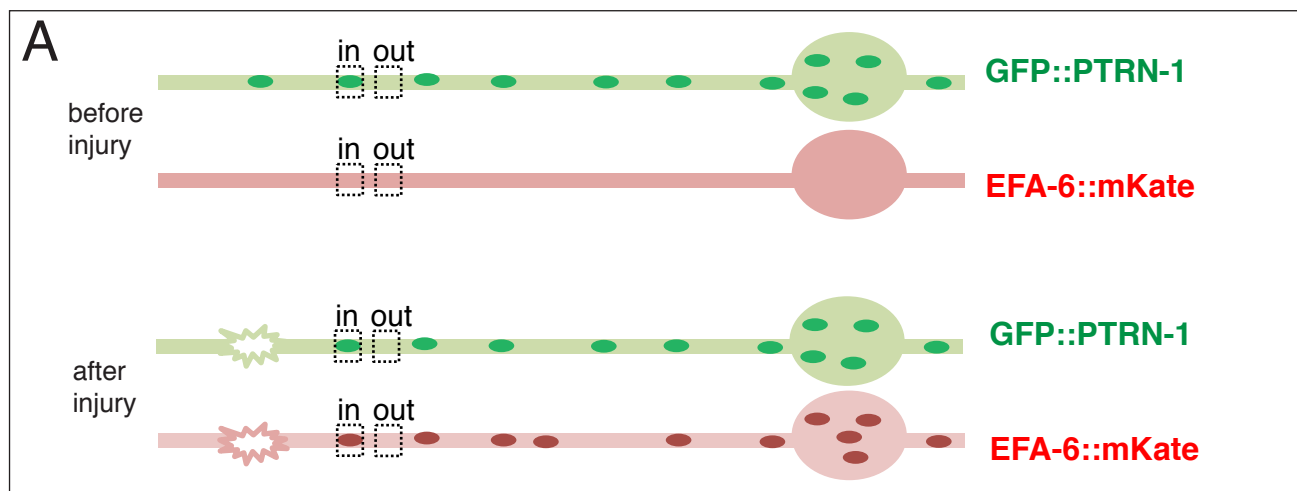

**B** tagRFP::PTRN-1 GFP::EFA-6N

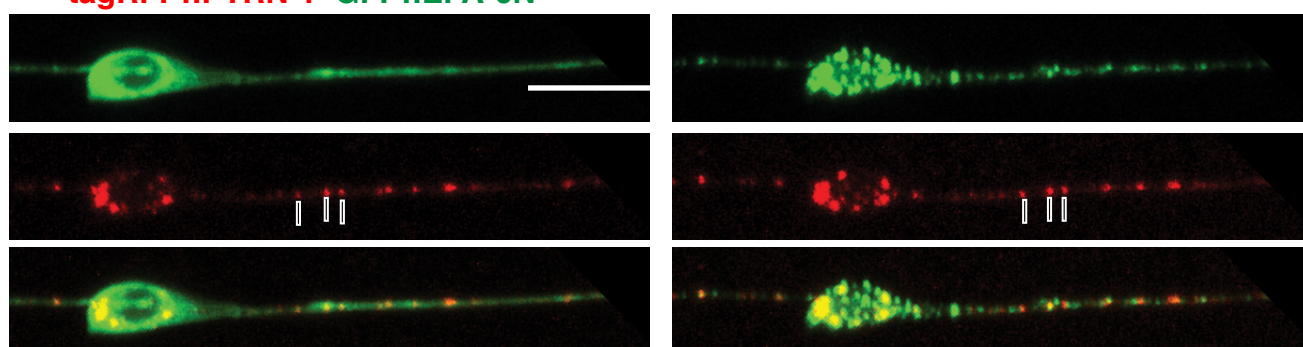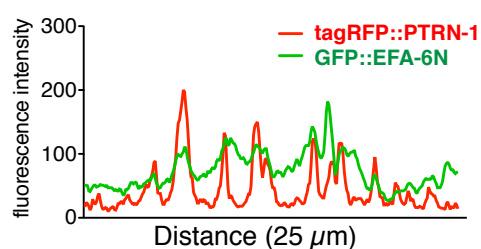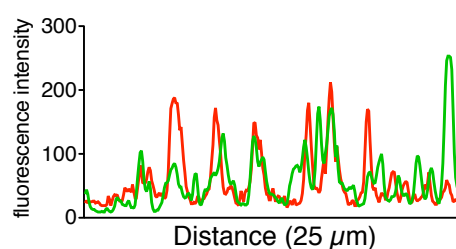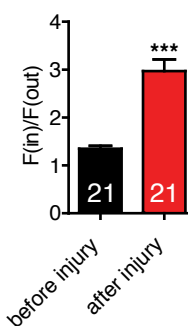

**C** *ptrn-1(0); Pmec-4-GFP::EFA-6N*

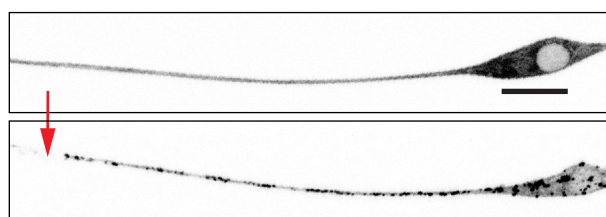

**D** *tac-1(0); ptrn-1(0); Pmec-4-GFP::EFA-6N*

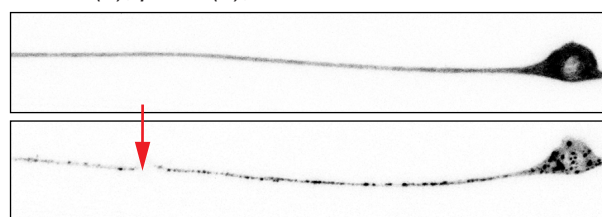

**E** *ptrn-1(0); Pmec-4-TAC-1::GFP*

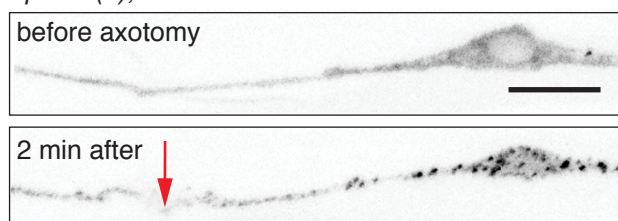

Figure 7-figure supplement 1
