# Supplementary figures and images for: Axon injury triggers EFA-6 mediated destabilization of axonal microtubules via TACC and doublecortin like kinase
Source: eLife journal article supplement (doi:10.7554/elife.08695), 2015-09-04

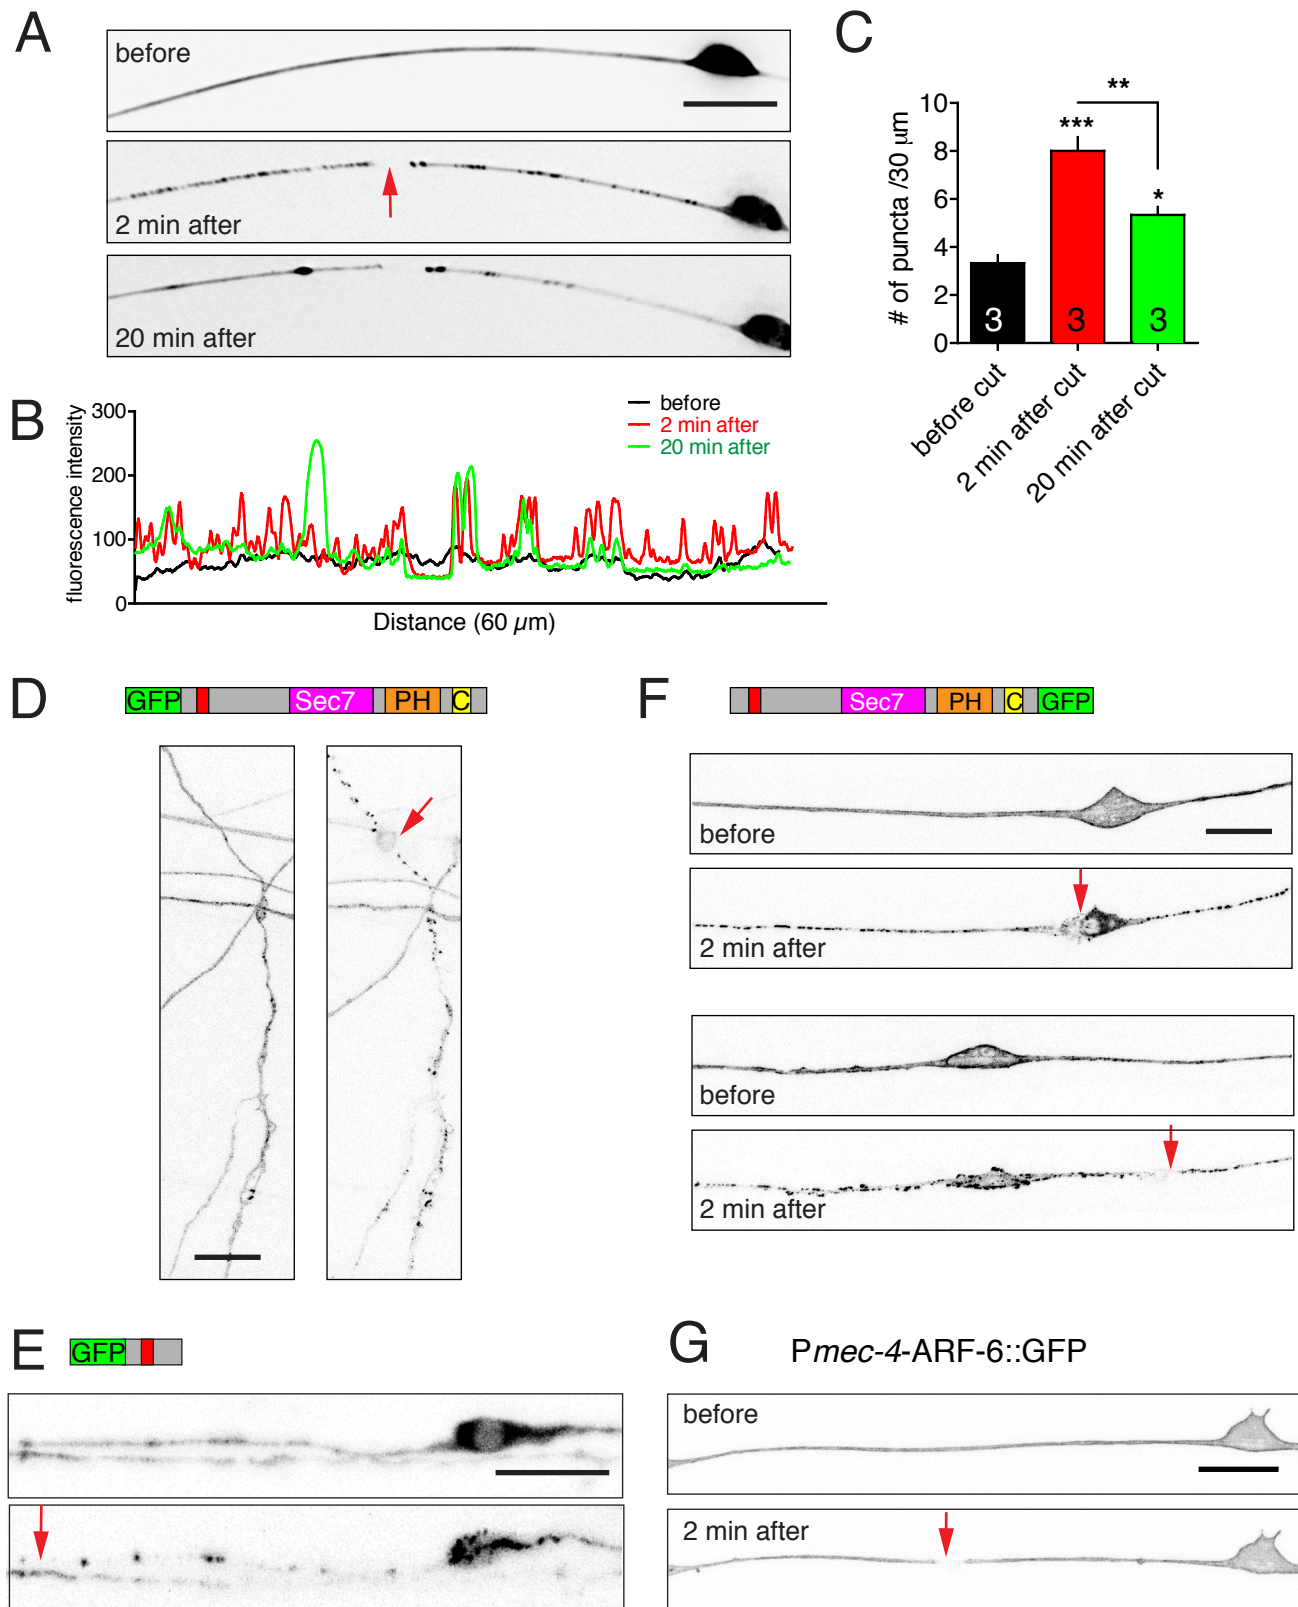

Figure 1-figure supplement 3

Supplement: supp [file elife-08695-supp-v1.zip]

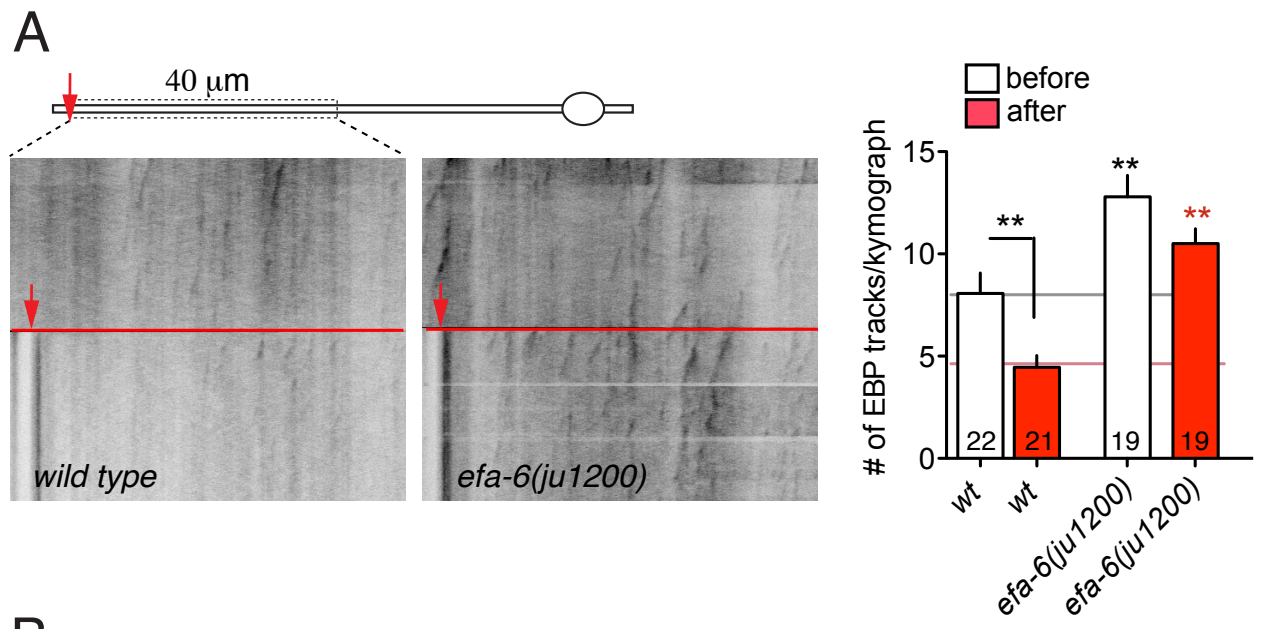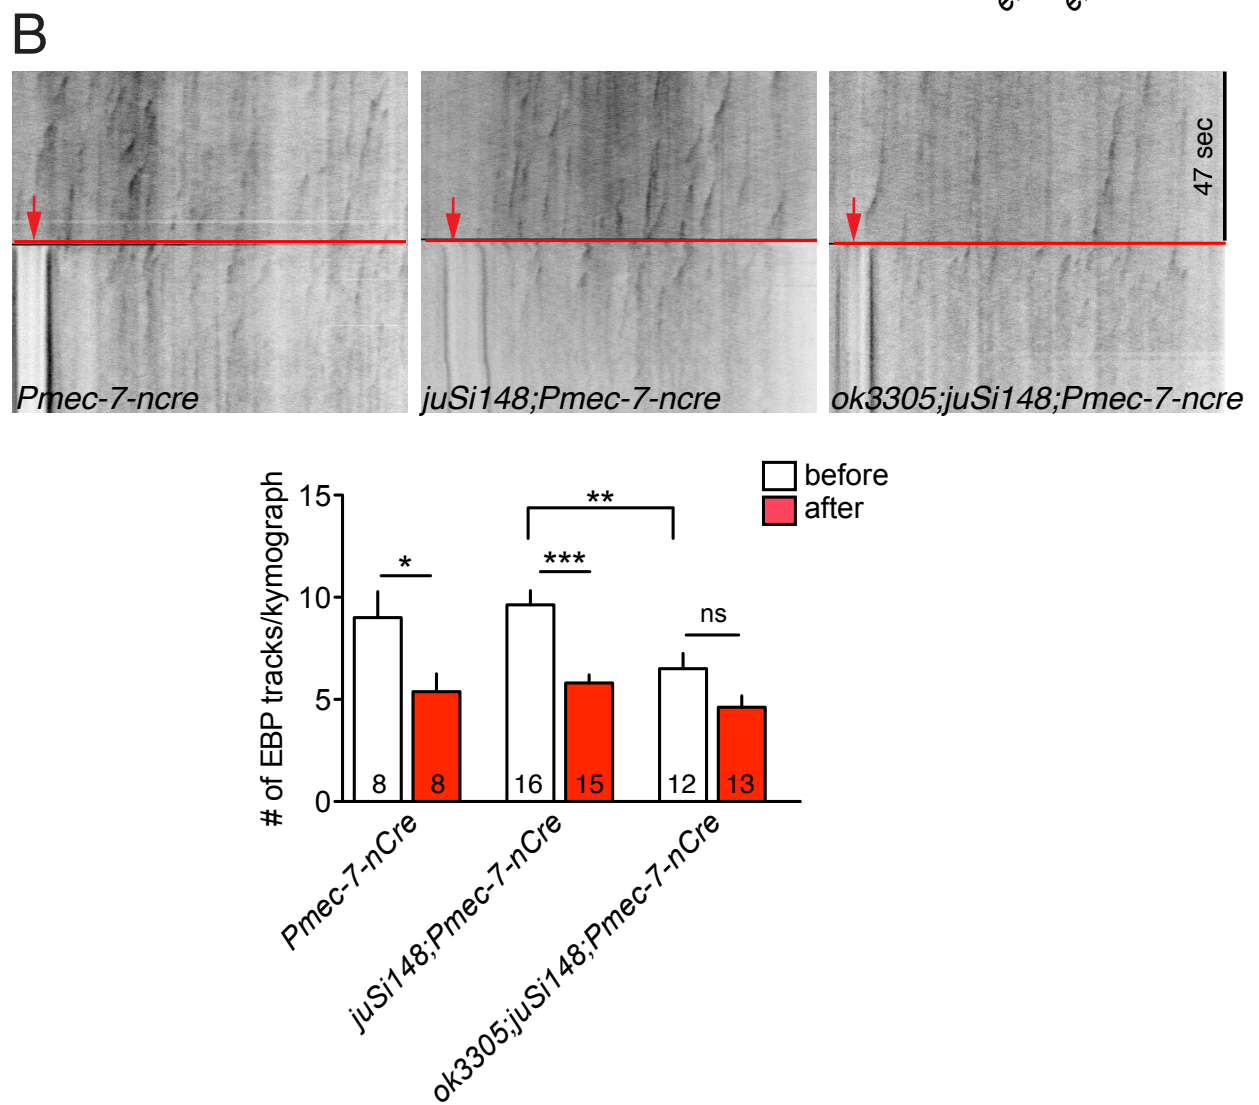

Figure 5-figure supplement 1

Supplement: supp [file elife-08695-supp-v1.zip]

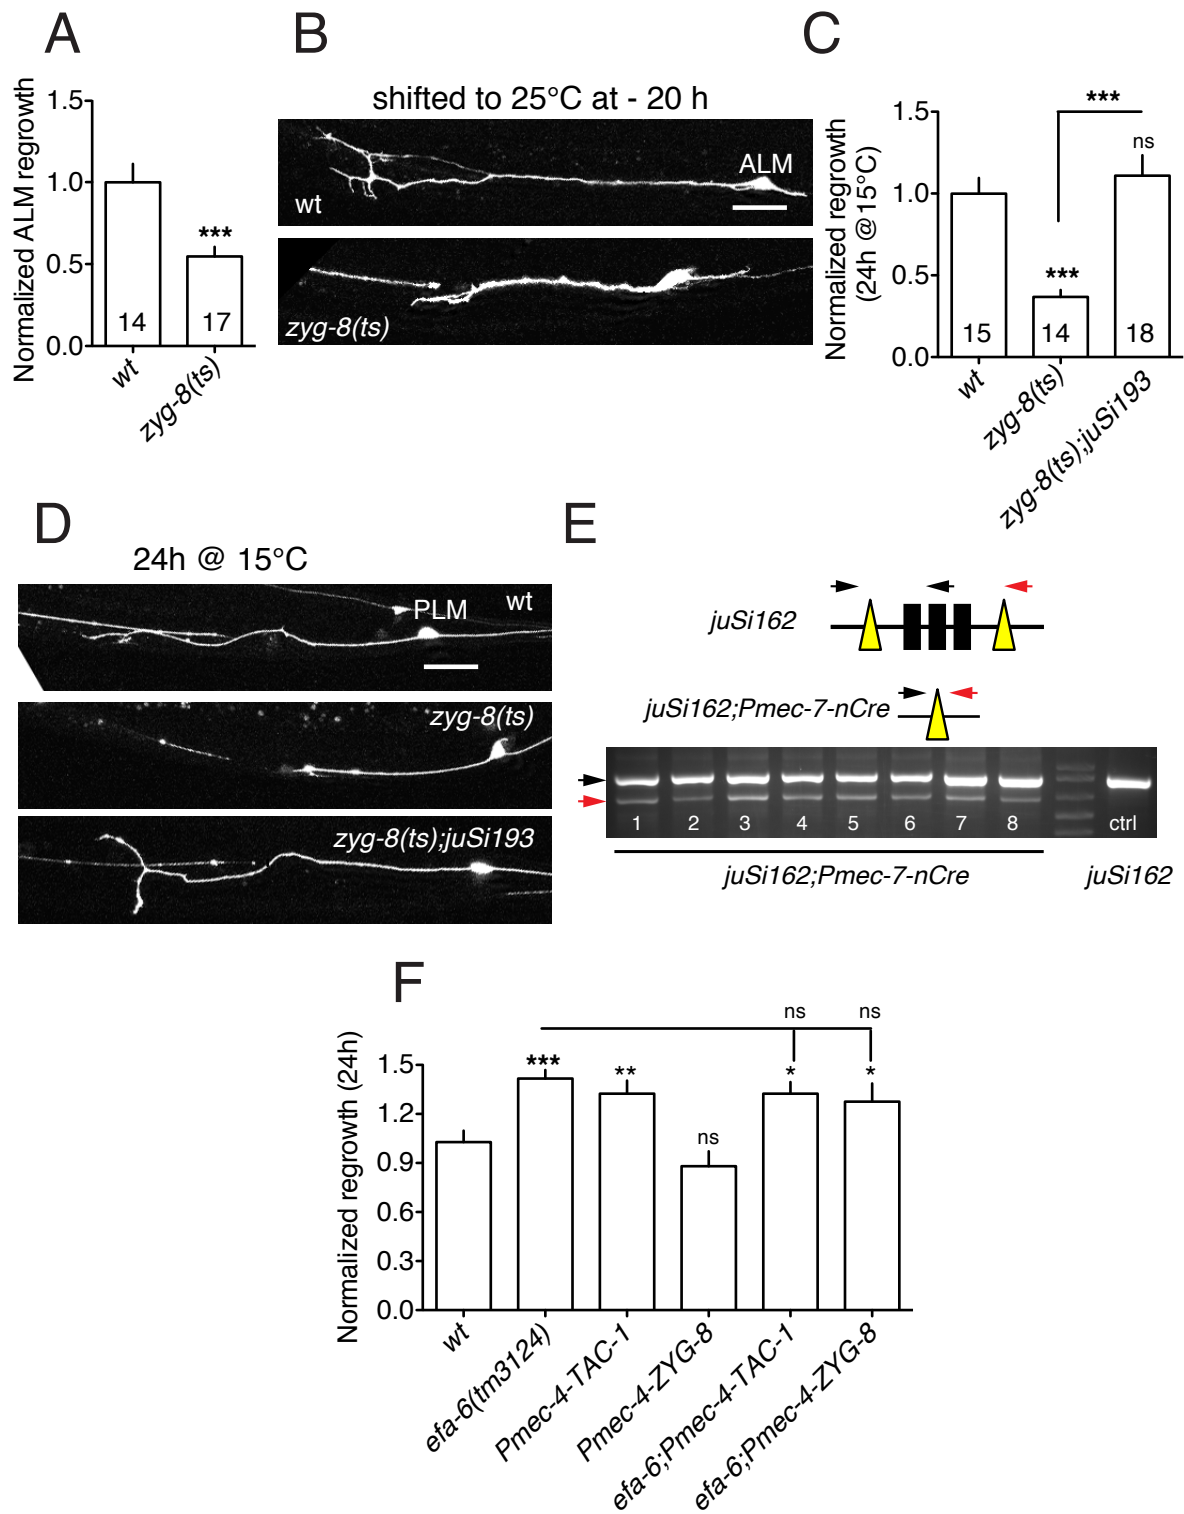

Figure 4-figure supplement 1

Supplement: supp [file elife-08695-supp-v1.zip]

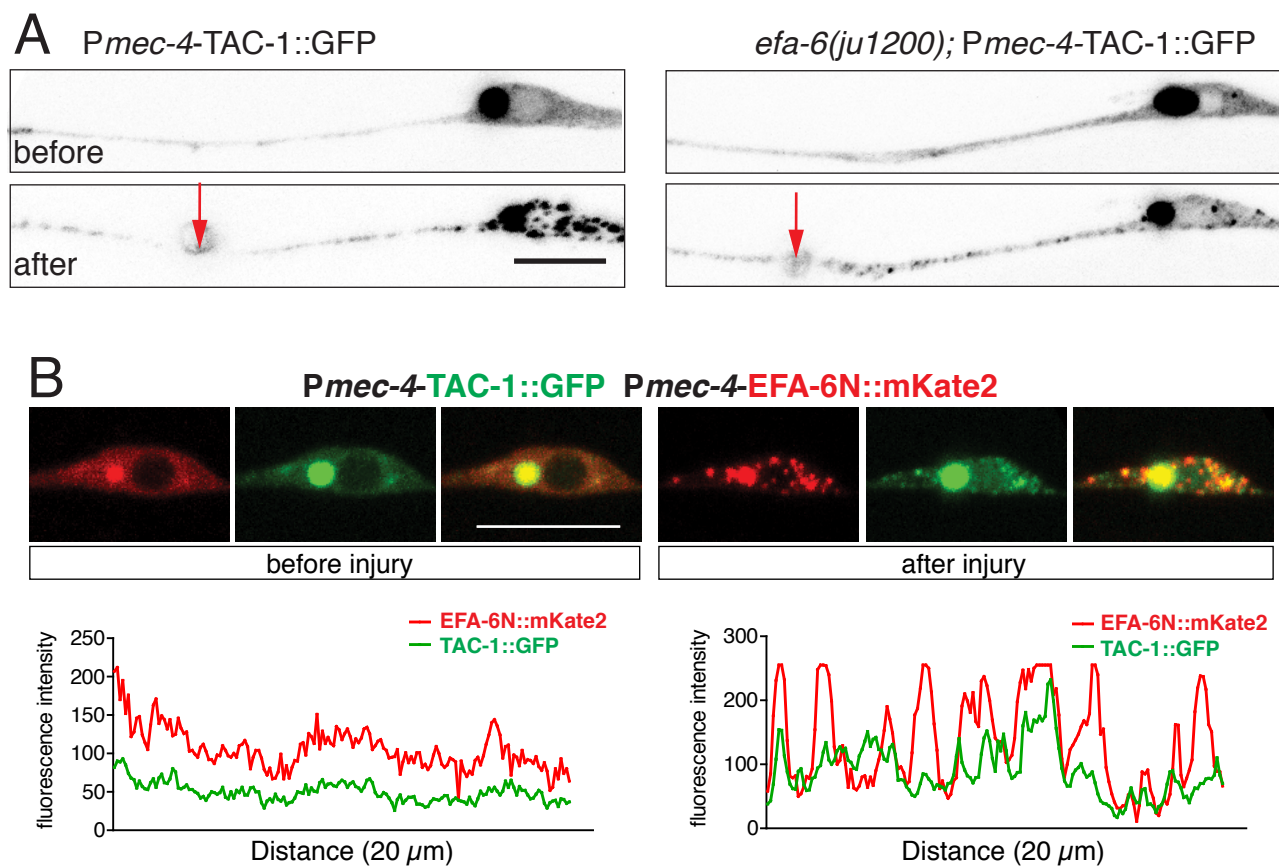

Figure 6-figure supplement 1

Supplement: supp [file elife-08695-supp-v1.zip]

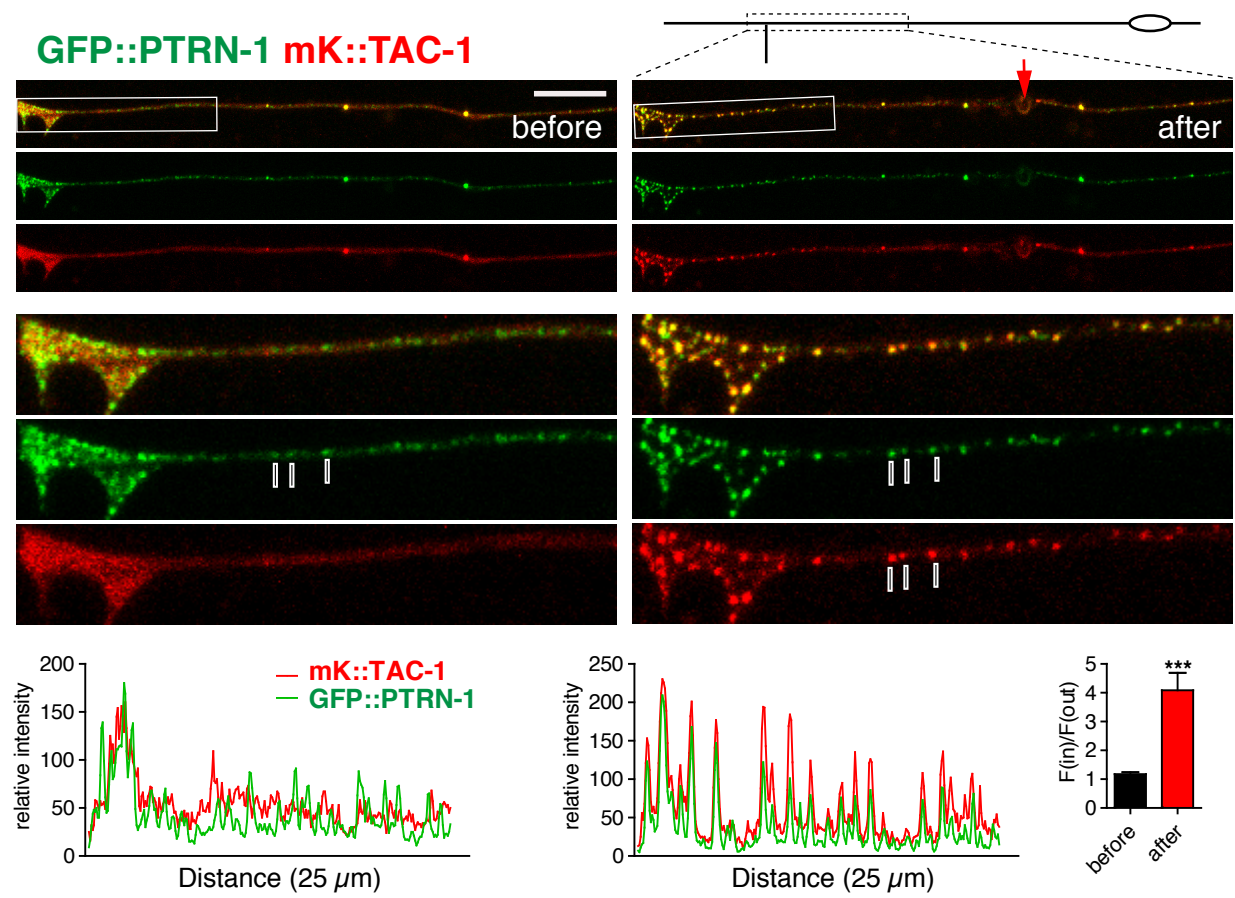

Figure 7-figure supplement 2

Supplement: supp [file elife-08695-supp-v1.zip]

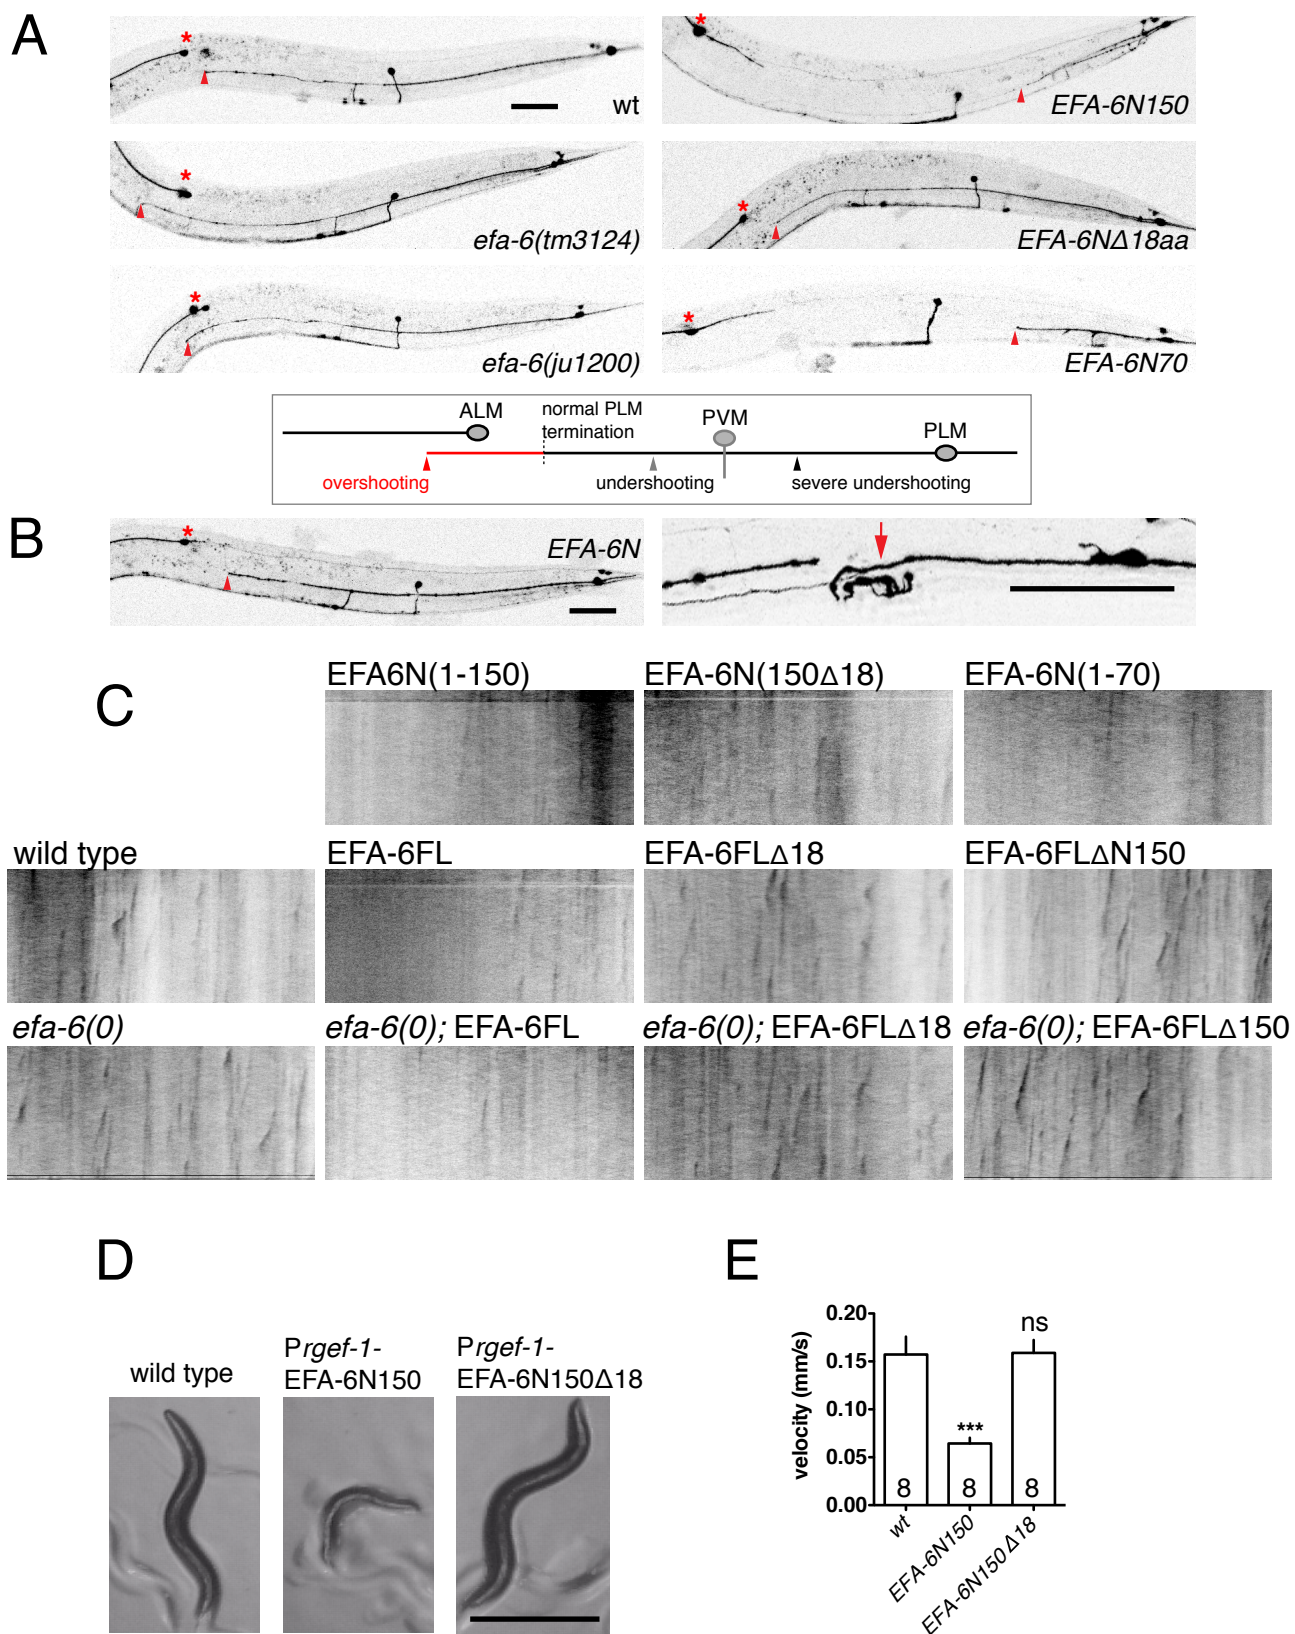

Figure 2-figure supplement 1

Supplement: supp [file elife-08695-supp-v1.zip]

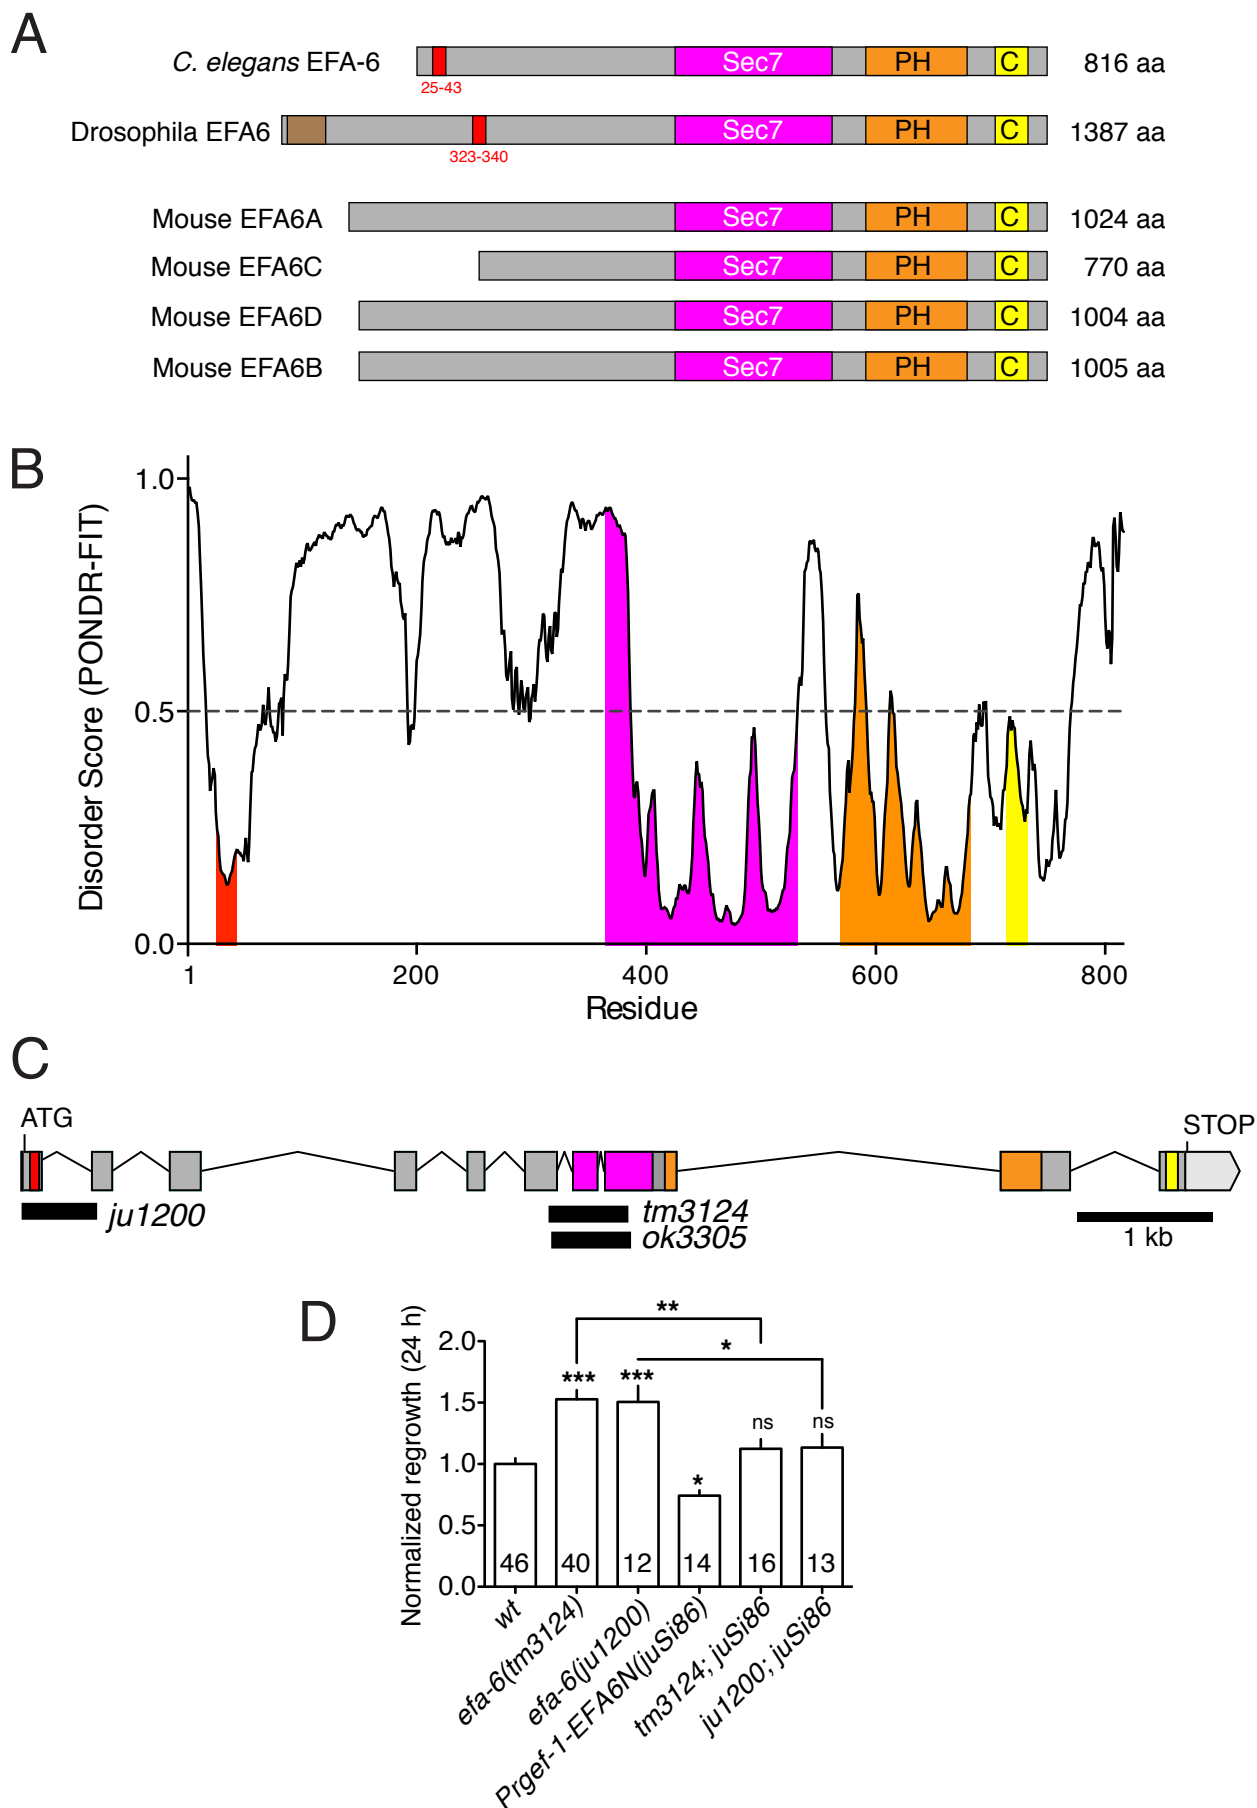

Figure 2-figure supplement 2

Supplement: supp [file elife-08695-supp-v1.zip]

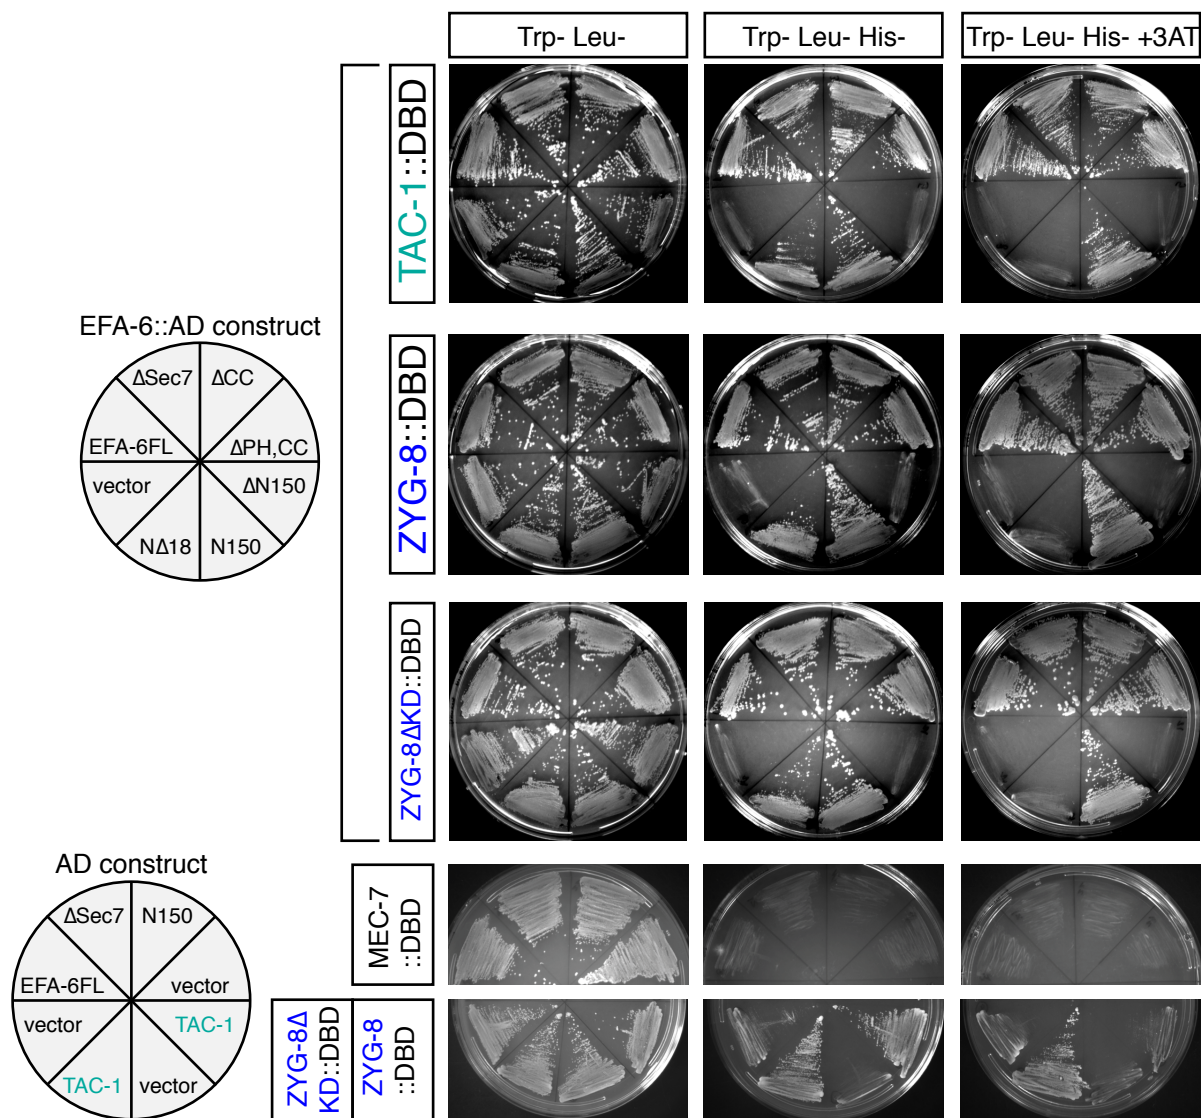

Figure 3-figure supplement 1

Supplement: supp [file elife-08695-supp-v1.zip]

A

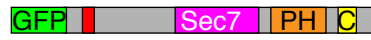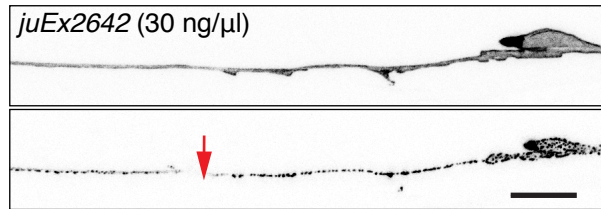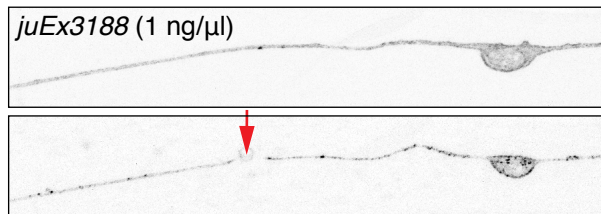

B

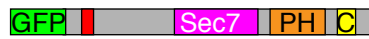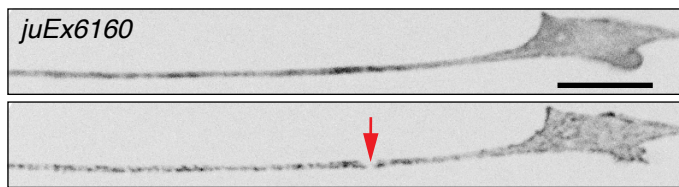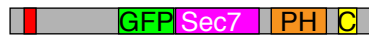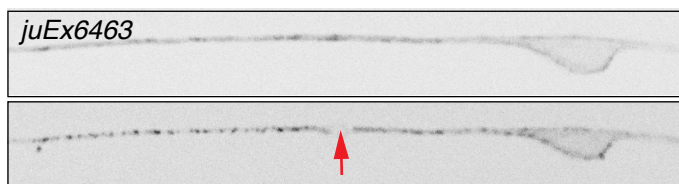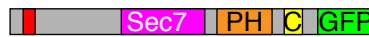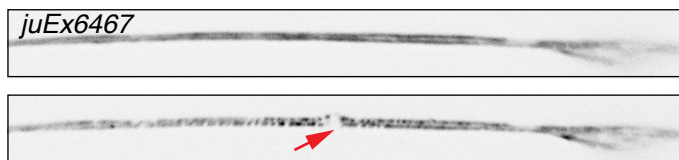

Supplement: supp [file elife-08695-supp-v1.zip]

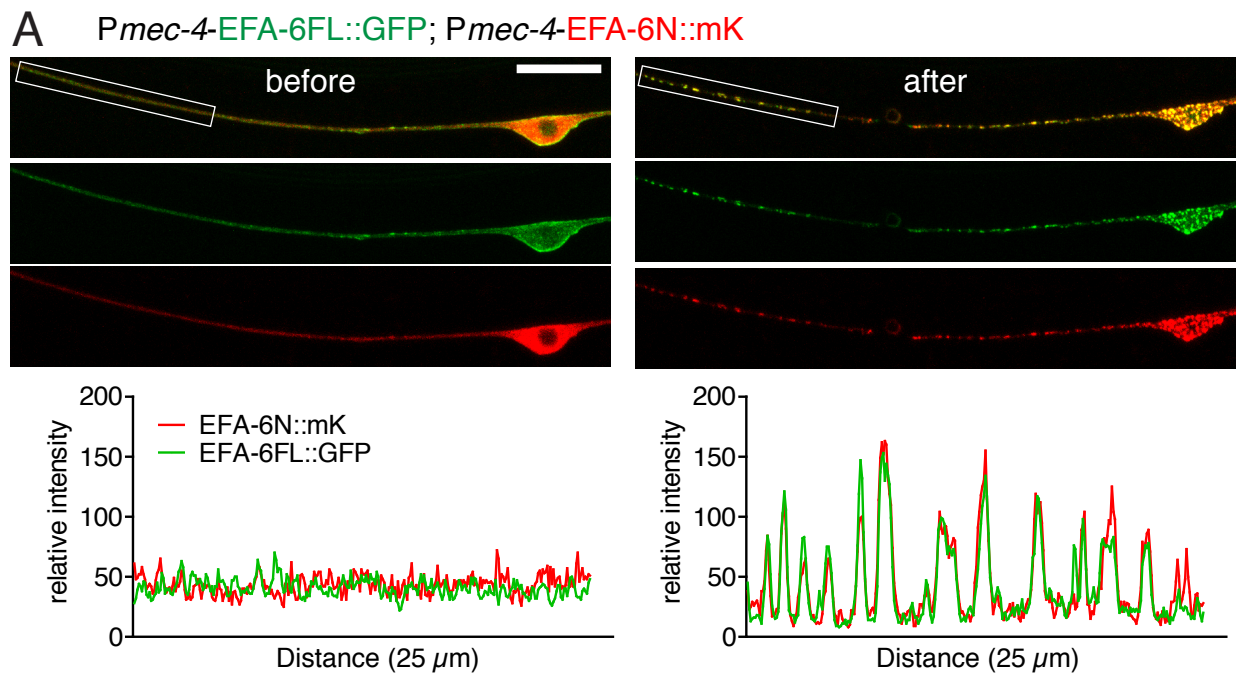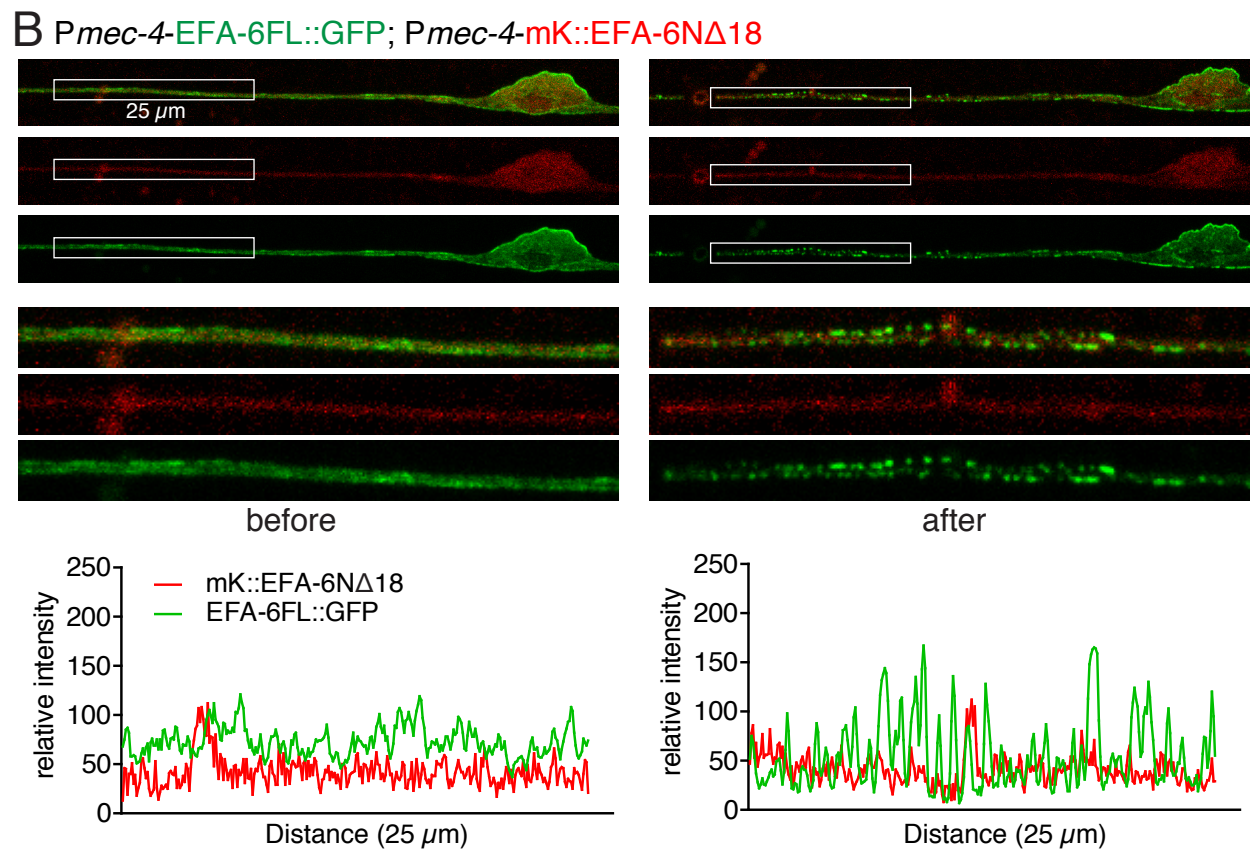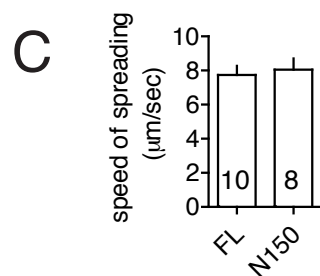

Figure 1-figure supplement 2

Supplement: supp [file elife-08695-supp-v1.zip]
